# Supplementary material for: Using High-Content Screening to Generate Single-Cell Gene-Corrected Patient-Derived iPS Clones Reveals Excess Alpha-Synuclein with Familial Parkinson’s Disease Point Mutation A30P
Source: Cells. 2020 Sep 10;9(9):2065. doi: 10.3390/cells9092065 (PMC7564375; doi:10.3390/cells9092065)
Supplement: Supplementary file 1 [file cells-09-02065-s001.zip]

Archive with 9 entries (9 files):
- Supp Figures/Supp. Figure 1.pdf
- Supp Figures/Supp. Figure 2.pdf
- Supp Figures/Supp. Figure 3.pdf
- Supp Figures/Supp. Figure 4_SNCA4-A30P clone 5.pdf
- Supp Figures/Supp. Figure 5_SNCA4-A30P clone 13.pdf
- Supp Figures/Supp. Figure 6_SNCA4-A30P clone 33.pdf
- Supp Figures/Supp. Figure 7_NPC gating.pdf
- Supp Figures/Supp. Figure 8 Tuj1TH gating.pdf
- Supp Figures/Supplementary table 1_Excision efficiency table.pdf
