# Supplementary material for: Using High-Content Screening to Generate Single-Cell Gene-Corrected Patient-Derived iPS Clones Reveals Excess Alpha-Synuclein with Familial Parkinson’s Disease Point Mutation A30P
Source: Cells. 2020 Sep 10;9(9):2065. doi: 10.3390/cells9092065 (PMC7564375; doi:10.3390/cells9092065)
Supplement: Supplementary file 1 [file cells-09-02065-s001.zip › Supp Figures/Supp. Figure 2.pdf]

|       |     |                                                                |     |
|-------|-----|----------------------------------------------------------------|-----|
| Seq_1 | 1   | -CACCACGTGTGCTAGTGTGGTGTAAAGGATTCATTAGCCATGGATGTATTCAATGAAAGGA | 59  |
|       |     | ### ## # ## #####                                              |     |
| Seq_2 | 1   | CACCCCAGGGTGG-AGTGTGGTGTAAAGGATTCATTAGCCATGGATGTATTCAATGAAAGGA | 59  |
| Seq_1 | 60  | CTTTCAAAGGCCAAGGAGGGAGTTGTGGCTGCTGCTGAGAAAACCAAACAGGGTGTGGCA   | 119 |
|       |     | #####                                                          |     |
| Seq_2 | 60  | CTTTCAAAGGCCAAGGAGGGAGTTGTGGCTGCTGCTGAGAAAACCAAACAGGGTGTGGCA   | 119 |
| Seq_1 | 120 | GAAGCAGCAGGAAAGACAAAAGAGGGTGTCTCTATGTAGGTAGGTAAACCCCAAATGTC    | 179 |
|       |     | #####                                                          |     |
| Seq_2 | 120 | GAAGCACCAGGAAAGACAAAAGAGGGTGTCTCTATGTAGGTAGGTAAACCCCAAATGTC    | 179 |
| Seq_1 | 180 | AGTTTGGTGCTTGTTTCATGA-----                                     | 199 |
|       |     | #####                                                          |     |
| Seq_2 | 180 | AGTTTGGTGCTTGTTTCATGATAAATAAACCTCGATATACAGACCGATAAACACATGCGT   | 239 |
| Seq_1 | 200 | -----                                                          | 199 |
|       |     | #####                                                          |     |
| Seq_2 | 240 | CAATTTTACGCATGATTATCTTTAACGTACGTCACAATATGATTATCTTTCTAGGGTTAA   | 299 |
| Seq_1 | 200 | ---GTGATGGGTTAGGATAATCAATACTCTAAATGCTGGTAGTTCTCTCTCTTGATTCAT   | 256 |
|       |     | ### ## # #####                                                 |     |
| Seq_2 | 300 | TGAGTGAT-GGTTAGGATAATCAATACTCTAAATGCTGGTAGTTCTCTCTCTTGATTCAT   | 358 |
| Seq_1 | 257 | TTTTGCAATCATTGCTTGTCAAAAAAGGTGGAA                              | 288 |
|       |     | #####                                                          |     |
| Seq_2 | 359 | TTTTGCAATCATTGCTTGTCAAAAAAGGTGGA-                              | 389 |

Supplementary Figure 2. 102 bp sequence insertion in Cl. 14. Seq\_1 refers to the gene-corrected clone SNCA Cl.33. Seq\_2 refers to Cl.14. The highlighted “grey” sequence refers to the 102 bp insertion. The highlighted “blue” base pair at 126 bp refers to the site of the A30P mutation.
