# Supplementary material for: Using High-Content Screening to Generate Single-Cell Gene-Corrected Patient-Derived iPS Clones Reveals Excess Alpha-Synuclein with Familial Parkinson’s Disease Point Mutation A30P
Source: Cells. 2020 Sep 10;9(9):2065. doi: 10.3390/cells9092065 (PMC7564375; doi:10.3390/cells9092065)
Supplement: Supplementary file 1 [file cells-09-02065-s001.zip › Supp Figures/Supp. Figure 7_NPC gating.pdf]

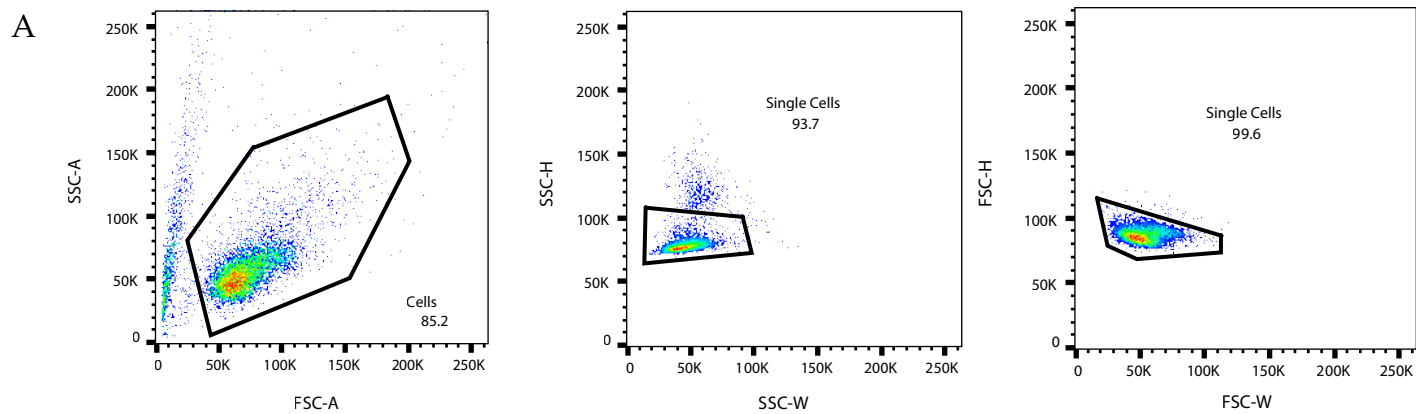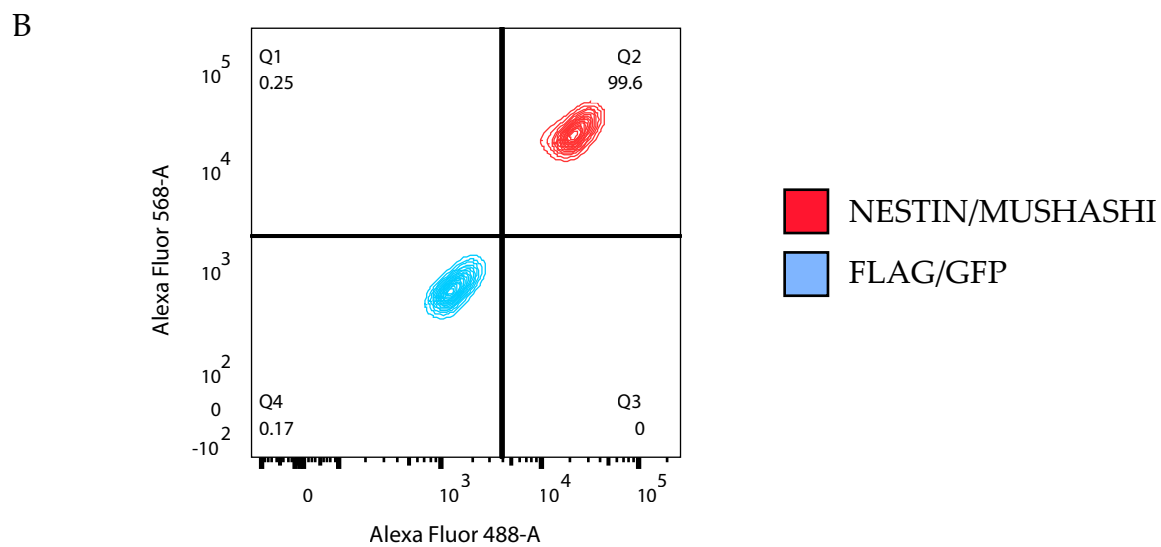

Supplementary Figure 7. Gating used to assess Nestin/Mushashi co-expression by flow cytometry analysis.

(A) Gating parameters used to analyse a single-cell population for analysis. (B) A representative contour plot showing positive co-expression of primary antibodies against NESTIN and MUSHASHI against internal negative controls FLAG and GFP.
