# Supplementary material for: Using High-Content Screening to Generate Single-Cell Gene-Corrected Patient-Derived iPS Clones Reveals Excess Alpha-Synuclein with Familial Parkinson’s Disease Point Mutation A30P
Source: Cells. 2020 Sep 10;9(9):2065. doi: 10.3390/cells9092065 (PMC7564375; doi:10.3390/cells9092065)
Supplement: Supplementary file 1 [file cells-09-02065-s001.zip › Supp Figures/Supplementary table 1_Excision efficiency table.pdf]

**Supplementary Table 1: Transposons-mediated excision efficiency**

| <b>Excision rate (EGFP-/DTOMATO-)</b> |                            |                            |                            |                            |
|---------------------------------------|----------------------------|----------------------------|----------------------------|----------------------------|
| <b>Cell line</b>                      | <b>1<sup>st</sup> sort</b> | <b>2<sup>nd</sup> sort</b> | <b>3<sup>rd</sup> sort</b> | <b>4<sup>th</sup> sort</b> |
| A30P-4 edited clone 5                 | 0.24%                      | 45.90%                     | 100%                       |                            |
| A30P-4 edited clone 13                | 0.11%                      | 43.60%                     | 100%                       |                            |
| A30P-4 edited clone 33                | 0.58%                      | 2.13%                      | 98.40%                     | 100%                       |
| A30P-4 edited clone 21                | 0.42%                      | 12.60%                     | 97%                        | 100%                       |
| A30P-4 edited clone 4                 | 0.19%                      | 2.68%                      | 99.50%                     |                            |
| <b>Average</b>                        | <b>0.31%</b>               | <b>21.38%</b>              | <b>99.98%</b>              | <b>100%</b>                |
